# Supplementary material for: Live Imaging of Bioluminescent Leptospira interrogans in Mice Reveals Renal Colonization as a Stealth Escape from the Blood Defenses and Antibiotics
Source: PLoS Negl Trop Dis. 2014 Dec 4;8(12):e3359. doi: 10.1371/journal.pntd.0003359 (PMC4256284; doi:10.1371/journal.pntd.0003359)
Supplement: Text S1 — Supporting information. Table S1. List of bioluminescent groESp-luciferase transformants of L. interrogans serovar Manilae. Figure S1. Kinetics of bioluminescent L. biflexa serovar Patoc in mice. Figure S2. Renal colonization is stable over time. Figure S3. Kinetics of dissemination of bioluminescent MFlum1 in Balb/c mice. Figure S4. Chronic renal colonization with L. interrogans does not result in weight loss. Figure S5. Controls 3 months post infection of absence of renal colonization in mice prophylactically treated with azithromycin. Figure S6. Doxycycline prophylaxis experiment. (PDF) [file pntd.0003359.s001.pdf]

## Text S1

**Table S1. List of bioluminescent *groESp*-luciferase transformants of *L. interrogans* serovar Manilae**

| Mutant name    | Location of insertion <sup>a</sup>             | Predicted function of mutated gene or description                             |
|----------------|------------------------------------------------|-------------------------------------------------------------------------------|
| <i>MGlum1</i>  | <i>LMANv1_8410002</i><br><i>LMANv1_8420001</i> | <i>Putative diguanylate phosphodiesterase – Hypothetical protein</i>          |
| <i>MGlum2</i>  | <i>LMANv1_310018</i>                           | ATPase and permease components of ABC-type multidrug transport system         |
| <i>MGlum3</i>  | <i>LMANv1_4270005</i>                          | Putative hydrolase                                                            |
| <i>MGlum4</i>  | <i>LMANv1_3480001</i><br><i>LMANv1_3480002</i> | <i>Two putative lipoproteins</i>                                              |
| <i>MGlum5</i>  | <i>LMANv1_4370006</i>                          | Conserved protein of unknown function                                         |
| <i>MGlum6</i>  | <i>LMANv1_7320006</i>                          | Serine phosphatase RsbU                                                       |
| <i>MGlum7</i>  | <i>LMANv1_8200001</i>                          | Putative lipoprotein                                                          |
| <i>MGlum8</i>  | <i>LMANv1_8420007</i>                          | Protein of unknown function                                                   |
| <i>MGlum9</i>  | <i>LMANv1_90006</i>                            | Conserved protein of unknown function                                         |
| <i>MGlum10</i> | <i>LMANv1_6580005</i>                          | Serine/threonine phosphatase containing GAF domains                           |
| <i>MGlum11</i> | <i>LMANv1_9140013</i>                          | Putative potassium efflux transporter                                         |
| <i>MGlum12</i> | <i>LMANv1_7910004</i>                          | Penicillin-binding protein 1 (PBP-1a)                                         |
| <i>MGlum13</i> | <i>LMANv1_810009</i><br><i>LMANv1_830001</i>   | <i>Two proteins of unknown function</i>                                       |
| <i>MGlum14</i> | <i>LMANv1_4100010</i>                          | Conserved protein of unknown function                                         |
| <i>MGlum15</i> | <i>LMANv1_6460002</i>                          | Potassium-transporting ATPase A chain                                         |
| <i>MGlum16</i> | <i>LMANv1_9780012</i>                          | Putative acyltransferase                                                      |
| <i>MGlum17</i> | <i>LMANv1_530008</i>                           | Conserved protein of unknown function                                         |
| <i>MGlum18</i> | <i>LMANv1_7610002</i><br><i>LMANv1_7610003</i> | <i>Sphingomyelinase C – Protein of unknown function</i>                       |
| <i>MGlum19</i> | <i>LMANv1_tRNA21</i>                           | End of Asn tRNA                                                               |
| <i>MGlum20</i> | <i>LMANv1_3950006</i><br><i>LMANv1_3950007</i> | <i>Conserved membrane protein – GTP-binding protein LepA</i>                  |
| <i>MGlum21</i> | <i>LMANv1_4900001</i>                          | Conserved exported protein of unknown function                                |
| <i>MGlum22</i> | <i>LMANv1_1100003</i>                          | LipL41                                                                        |
| <i>MGlum23</i> | <i>LMANv1_8450001</i>                          | Fic protein involved in cell division                                         |
| <i>MGlum24</i> | <i>LMANv1_4380015</i>                          | Anti-sigma factor antagonist                                                  |
| <i>MGlum25</i> | <i>LMANv1_4490003</i>                          | Conserved hypothetical protein; putative signal peptide                       |
| <i>MGlum26</i> | <i>LMANv1_4160004</i>                          | Conserved exported protein of unknown function                                |
| <i>MGlum27</i> | <i>LMANv1_2120012</i><br><i>LMANv1_2120013</i> | <i>Adenylate/guanylate cyclase – Conserved protein</i>                        |
| <i>MGlum28</i> | <i>LMANv1_4790001</i>                          | Conserved protein of unknown function                                         |
| <i>MGlum29</i> | <i>LMANv1_1930003</i><br><i>LMANv1_1930004</i> | <i>Putative lipoprotein – Conserved protein</i>                               |
| <i>MGlum30</i> | <i>LMANv1_4160005</i><br><i>LMANv1_4160004</i> | <i>Putative arginyl-tRNA-protein transferase – Conserved exported protein</i> |
| <i>MGlum31</i> | <i>LMANv1_450004</i><br><i>LMANv1_450005</i>   | <i>Putative lipoprotein – Conserved protein of unknown function</i>           |
| <i>MGlum32</i> | <i>LMANv1_7590002</i>                          | Conserved membrane protein of unknown function                                |

<sup>a</sup> as annotated in MicroScope (<http://www.genoscope.cns.fr/agc/microscope/home/index.php>)

italics: insertion in an intergenic region

The promoter *groEp* was amplified from *L. interrogans* Fiocruz L1-130 DNA (location chromosome 1 1648924-1649178) using the specific primers (pGroSF: TGTGCTAGCATGATTTGCAGTAGTTCCC and pGroSR: ATGCCATGGACTGACTCCTTAAAATTTATAAG) and was subcloned into pBAD::Luc with the *NheI* enzyme, resulting in the plasmid pGroES::Luc. The luciferase cassette was recovered from the pGroES::Luc plasmid using the *NheI*/*ScaI* enzymes. Plasmid pCj::GroE was generated by cloning the blunt-ended luciferase cassette into the blunt-ended *PacI* restriction site of the suicide conjugative plasmid pCjTKS2. Bioluminescent transformants of *L. interrogans* serovar Manilae (MGlum) were selected after conjugation with *E. coli*  $\beta$ 2163 carrying pCj::pGroES.

Figure S1

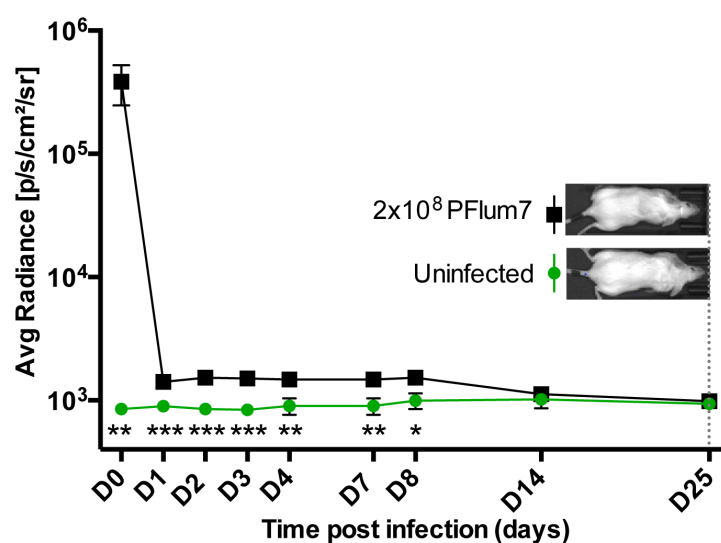

**Fig S1. Kinetics of bioluminescent *L. biflexa* serovar Patoc in mice**

Live imaging tracking over time of  $2 \times 10^8$  bioluminescent *L. biflexa* Patoc PFlum7 injected intra-peritoneally (IP) into albino C57BL/6J mice. Bioluminescence analyses were carried out after the IP administration of D-luciferin. Data are expressed as the mean  $\pm$  SEM of average radiance of light measured in photons/second/cm<sup>2</sup> in n=4 mice and imaged in the ventral view. *p* values ( \**p* < 0.05, \*\**p* < 0.01, \*\*\**p* < 0.001) between infected and uninfected group. On the right side are shown images of the last tracking point (25 dpi) of one infected mouse compared to one uninfected mouse.

**Figure S2**

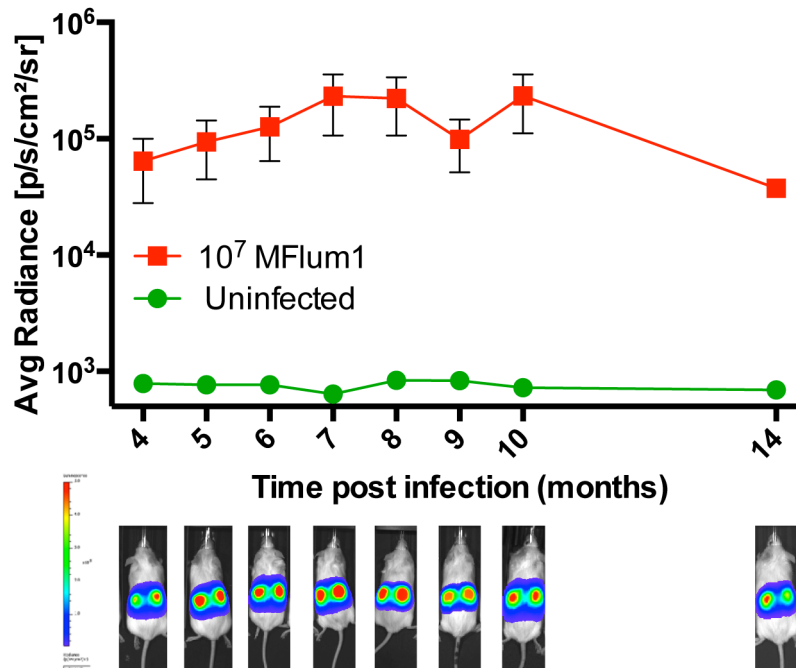

**Fig S2. Renal colonization is stable over time**

Live imaging tracking of  $10^7$  MFlum1 IP injected to albino C57BL/6J mice, between 4 and 14 months. Bioluminescence analyses were performed after IP administration or addition of D-luciferin. Data are expressed as the mean  $\pm$  SEM of average radiance of light measured in photons/second/cm<sup>2</sup> in n=4 infected mice, imaged in the dorsal view. Images below the graph show the tracking of one infected mouse. Images depict photographs overlaid with color representations of luminescence intensity, measured in photons/second/cm<sup>2</sup> as indicated on the scale, where red is the most intense and purple the least intense. For infected mice, there were no statistically significant differences between means of groups, corresponding to imaging at the different time points, as determined by one-way ANOVA (p : 0,63).

**Figure S3**

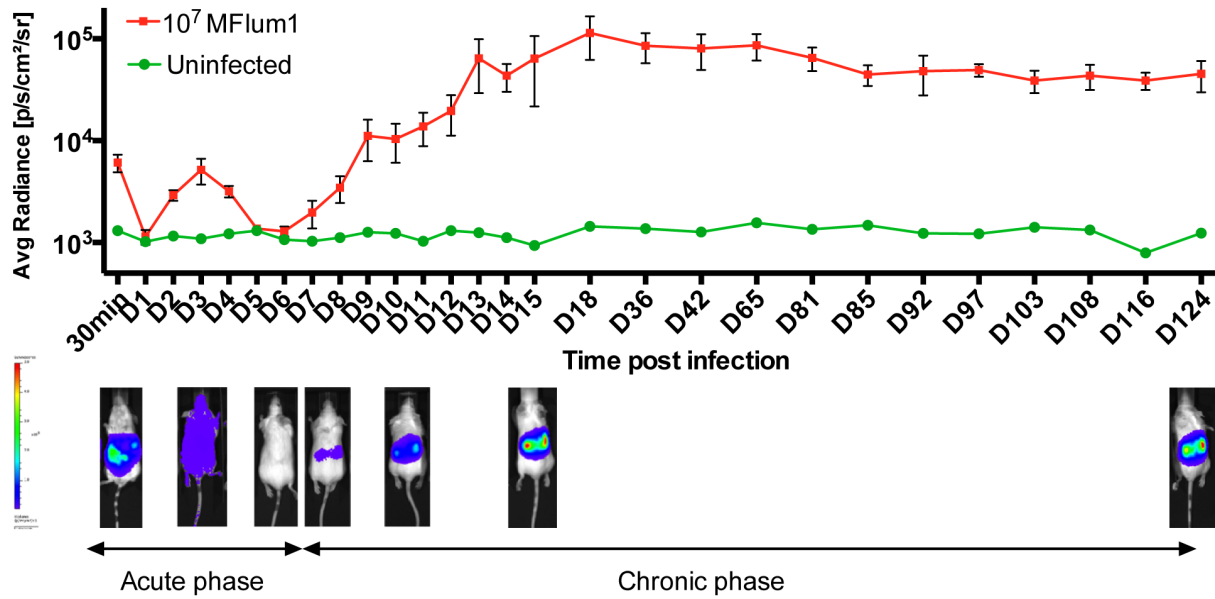

**Fig S3. Kinetics of dissemination of bioluminescent MFlum1 in Balb/c mice**

Live imaging tracking of  $10^7$  MFlum1 IP injected to Balb/c mice. Images below the graph show the tracking of one infected mouse, photographed at different crucial time points. All the bioluminescence analyses were performed after IP administration or addition of D-luciferin. Data are expressed as the mean  $\pm$  SEM of average radiance of light measured in photons/second/cm<sup>2</sup> in n=4 infected mice, imaged in the dorsal view, except for 30 min post-infection for which only imaging in the ventral view allows the visualization of the leptospiral dissemination in the peritoneal cavity. Images depict photographs overlaid with color representations of luminescence intensity, measured in photons/second/cm<sup>2</sup> as indicated on the scale, where red is the most intense and purple the least intense.

**Figure S4**

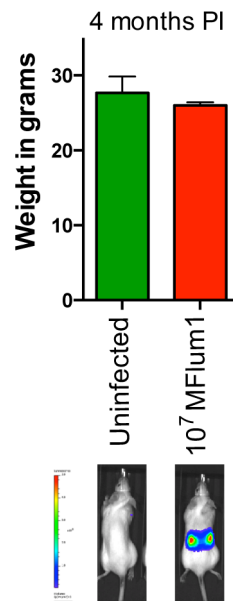

**Fig S4. Chronic renal colonization with *L. interrogans* does not result in weight loss**

Comparison of weight in grams between n=4 uninfected mice and n=4 infected mice with 10<sup>7</sup> MFlum1 4 months post-infection (PI). Images below the graph show the corresponding bioluminescence of an uninfected and an infected mouse. Bioluminescence analysis was performed after IP administration or addition of D-luciferin. Images depict photographs overlaid with color representations of luminescence intensity, measured in photons/second/cm<sup>2</sup> as indicated on the scales, where red is the most intense and purple the least intense.

Figure S5

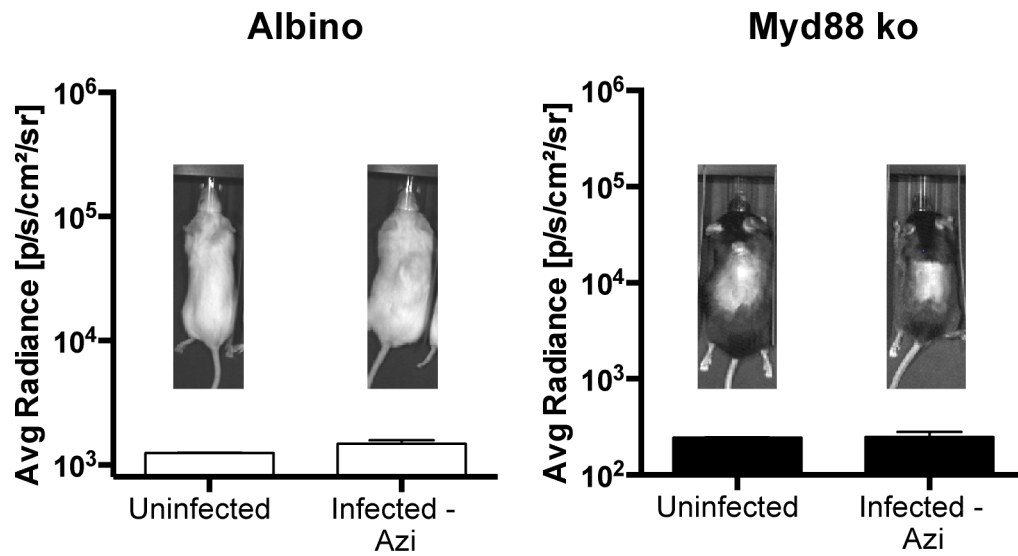

**Fig S5. Controls 3 months post infection of absence of renal colonization in mice prophylactically treated with azithromycin**

*In vivo* live imaging and quantification of albino and black Myd88 ko C57BL/6J mice 3 months post infection with (Infected-Azi) or without (Uninfected)  $2 \times 10^8$  MFlum1. Infected-azi mice were injected IP two days before infection (T-2) with azithromycin. As controls, uninfected mice were treated with azithromycin, and the infected control mice died between 2 and 3 dpi for both albino and Myd88 ko C57BL/6J. Data are expressed as the mean  $\pm$  SEM of average radiance of light measured in photons/second/cm<sup>2</sup> in n=4 mice imaged in the dorsal view, where imaging was carried out after dorsal shaving of the black mice. Above are shown corresponding images of live mice after IP addition of D-luciferin.

Figure S6

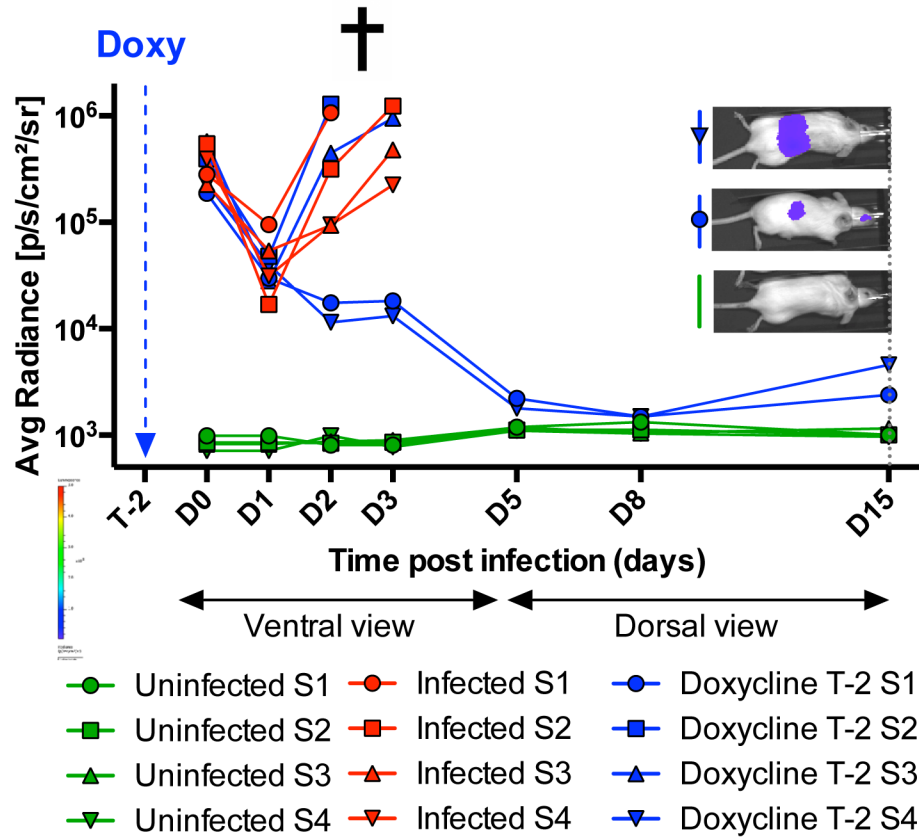

Fig S6. Doxycycline prophylaxis experiment

8 C57BL/6J mice were infected with  $2 \times 10^8$  MFlum1 and 4 of them were injected IP two days before infection (T-2) with a single dose of doxycycline (Doxy) ( $70 \mu\text{g}/\text{mouse}$  which is equivalent to the human single dose of  $200 \text{mg}/60 \text{kg}$ ). As controls, 4 uninfected mice were treated with doxycycline. All bioluminescence analyses were performed after IP administration of D-luciferin. Data are expressed in average radiance of light measured in photons/second/cm<sup>2</sup> in every single mouse imaged in the ventral view between D0 and D5 for the visualization of the leptospiral dissemination and imaged in the dorsal view at D8 and D15 for the visualization of kidneys colonization. The cross indicates that the mice died or were sacrificed because of acute leptospirosis. On the right side are shown images of the last tracking point (15 dpi) of the 2 surviving treated-infected mice compared to a representative uninfected treated mouse.
